# Supplementary material for: Morphological evolution of cadmium oxide crystals showing color changes and facet-dependent conductivity behavior
Source: Royal Society of Chemistry journal article supplement (doi:10.1039/d2tc02318k), 2022-01-01
Supplement: d2tc02318k1.pdf [file d2tc02318k1.pdf]

Electronic Supplementary Information

**Morphological evolution of cadmium oxide crystals showing color changes and facet-dependent conductivity behavior**

Gautam Kumar,<sup>a</sup> Chong-Rui Chen,<sup>a</sup> Bo-Hao Chen,<sup>ab</sup> Jing-Wei Chen,<sup>a</sup> and Michael H. Huang<sup>\*a</sup>

<sup>a</sup>*Department of Chemistry and Frontier Research Center on Fundamental and Applied Sciences of Matters, National Tsing Hua University, Hsinchu 300044, Taiwan*

*E-mail: hyhuang@mx.nthu.edu.tw*

<sup>b</sup>*National Synchrotron Radiation Research Center, Hsinchu 300092, Taiwan*

**Gibbs free energy change calculation**

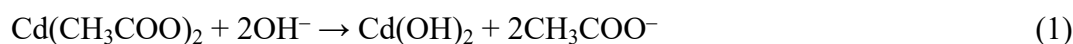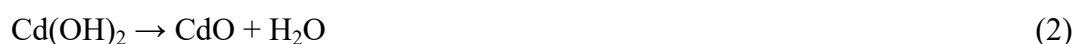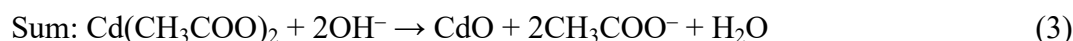

$$Q = [\text{CH}_3\text{COO}^-]^2 / [\text{Cd}(\text{CH}_3\text{COO})_2][\text{OH}^-]^2$$

For CdO stellated octahedra,  $[\text{CH}_3\text{COO}^-] = 0.04 \text{ M}$   $[\text{Cd}(\text{CH}_3\text{COO})_2] = 0.02 \text{ M}$   
 $[\text{OH}^-] = 0.04 \text{ M}$   $Q = 50.00 \text{ M}^{-1}$

For CdO octahedra,  $[\text{CH}_3\text{COO}^-] = 0.14 \text{ M}$   $[\text{Cd}(\text{CH}_3\text{COO})_2] = 0.07 \text{ M}$   $[\text{OH}^-] = 0.14 \text{ M}$   
 $Q = 14.29 \text{ M}^{-1}$

For CdO truncated octahedra,  $[\text{CH}_3\text{COO}^-] = 0.18 \text{ M}$   $[\text{Cd}(\text{CH}_3\text{COO})_2] = 0.09 \text{ M}$   
 $[\text{OH}^-] = 0.18 \text{ M}$   $Q = 11.11 \text{ M}^{-1}$

For Cd(OH)<sub>2</sub> hexagonal plates,  $[\text{CH}_3\text{COO}^-] = 0.24 \text{ M}$   $[\text{Cd}(\text{CH}_3\text{COO})_2] = 0.12 \text{ M}$   
 $[\text{OH}^-] = 0.24 \text{ M}$   $Q = 8.33 \text{ M}^{-1}$

$$\Delta G = \Delta G^\circ + RT \ln Q$$

$$\Delta G^\circ = -228.4 \text{ kJ/mol for CdO} \quad T = 423 \text{ K} \quad R = 8.31451 \text{ J/K mol}$$

$$\Delta G = -214.6 \text{ kJ/mol for stellated octahedra}$$

$$\Delta G = -219.0 \text{ kJ/mol for octahedra}$$

$$\Delta G = -219.9 \text{ kJ/mol for truncated octahedra}$$

$$\Delta G = -220.9 \text{ kJ/mol for Cd(OH)}_2 \text{ hexagonal plates}$$

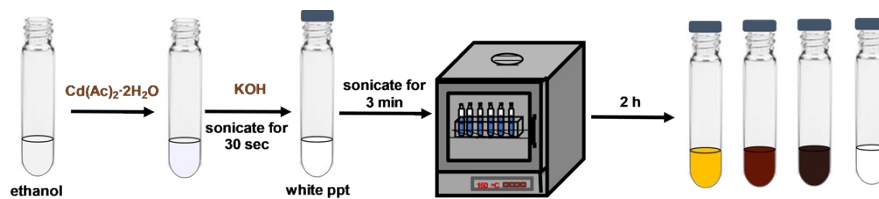

| Shape                                | Ethanol (mL) | 1 M Cd(CH <sub>3</sub> COO) <sub>2</sub> ·2H <sub>2</sub> O (mL)   | 1 M KOH (mL)   | Total volume (mL) | Reaction temperature (°C) | Reaction time (h) |
|--------------------------------------|--------------|--------------------------------------------------------------------|----------------|-------------------|---------------------------|-------------------|
| CdO stellated octahedra              | 4.7          | 0.1                                                                | 0.2            | 5                 | 150                       | 2                 |
| Shape                                | Ethanol (mL) | 0.5 M Cd(CH <sub>3</sub> COO) <sub>2</sub> ·2H <sub>2</sub> O (mL) | 0.5 M KOH (mL) | Total volume (mL) | Reaction Temperature (°C) | Reaction time (h) |
| CdO octahedra                        | 2.9          | 0.7                                                                | 1.4            | 5                 | 150                       | 2                 |
| CdO truncated octahedra              | 2.3          | 0.9                                                                | 1.8            |                   |                           |                   |
| Cd(OH) <sub>2</sub> hexagonal plates | 1.4          | 1.2                                                                | 2.4            |                   |                           |                   |

**Fig. S1** Reaction procedure and the reagent amounts used to synthesize CdO crystals and Cd(OH)<sub>2</sub> plates.

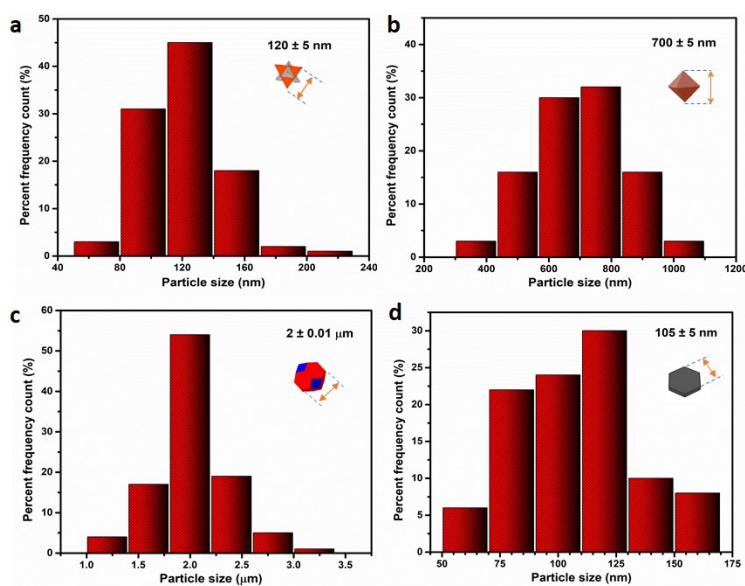

**Fig. S2** Size distribution histograms of the synthesized CdO (a) stellated octahedra, (b) octahedra, (c) truncated octahedra, and (d) Cd(OH)<sub>2</sub> hexagonal plates.

**Table S1** Crystallographic data of Cd(OH)<sub>2</sub>.

|                                    |                                                       |
|------------------------------------|-------------------------------------------------------|
| Formula                            | H <sub>2</sub> Cd O <sub>2</sub>                      |
| Molecular weight (g/mol)           | 146.42                                                |
| Radiation source                   | Synchrotron NSRRC TPS19A                              |
| Wavelength (Å)                     | 0.77489                                               |
| Crystal system                     | Trigonal                                              |
| Space group                        | <i>P</i> -3 m 1 (164)                                 |
| <i>Z</i>                           | 1                                                     |
| <i>a</i> (Å)                       | 3.49615(8)                                            |
| <i>b</i> (Å)                       | 3.49615(8)                                            |
| <i>c</i> (Å)                       | 4.71465(11)                                           |
| $\alpha$                           | 90.0                                                  |
| $\beta$                            | 90.0                                                  |
| $\gamma$                           | 120.0                                                 |
| Volume (Å <sup>3</sup> )           | 49.9068(19)                                           |
| Temperature (K)                    | Room temperature                                      |
| 2 $\theta$ range (°)               | 7.0–69.75                                             |
| <i>d</i> resolution (Å)            | 0.682                                                 |
| Total reflection number            | 85                                                    |
| limiting indices                   | 0 ≤ <i>h</i> ≤ 4; 0 ≤ <i>k</i> ≤ 2; -6 ≤ <i>l</i> ≤ 6 |
| <i>Rietveld</i> Refinement program | GSAS II <sup>1</sup>                                  |
| R <sub>p</sub>                     | 1.62%                                                 |
| wR <sub>p</sub>                    | 2.14%                                                 |
| RF <sup>2</sup>                    | 3.68%                                                 |

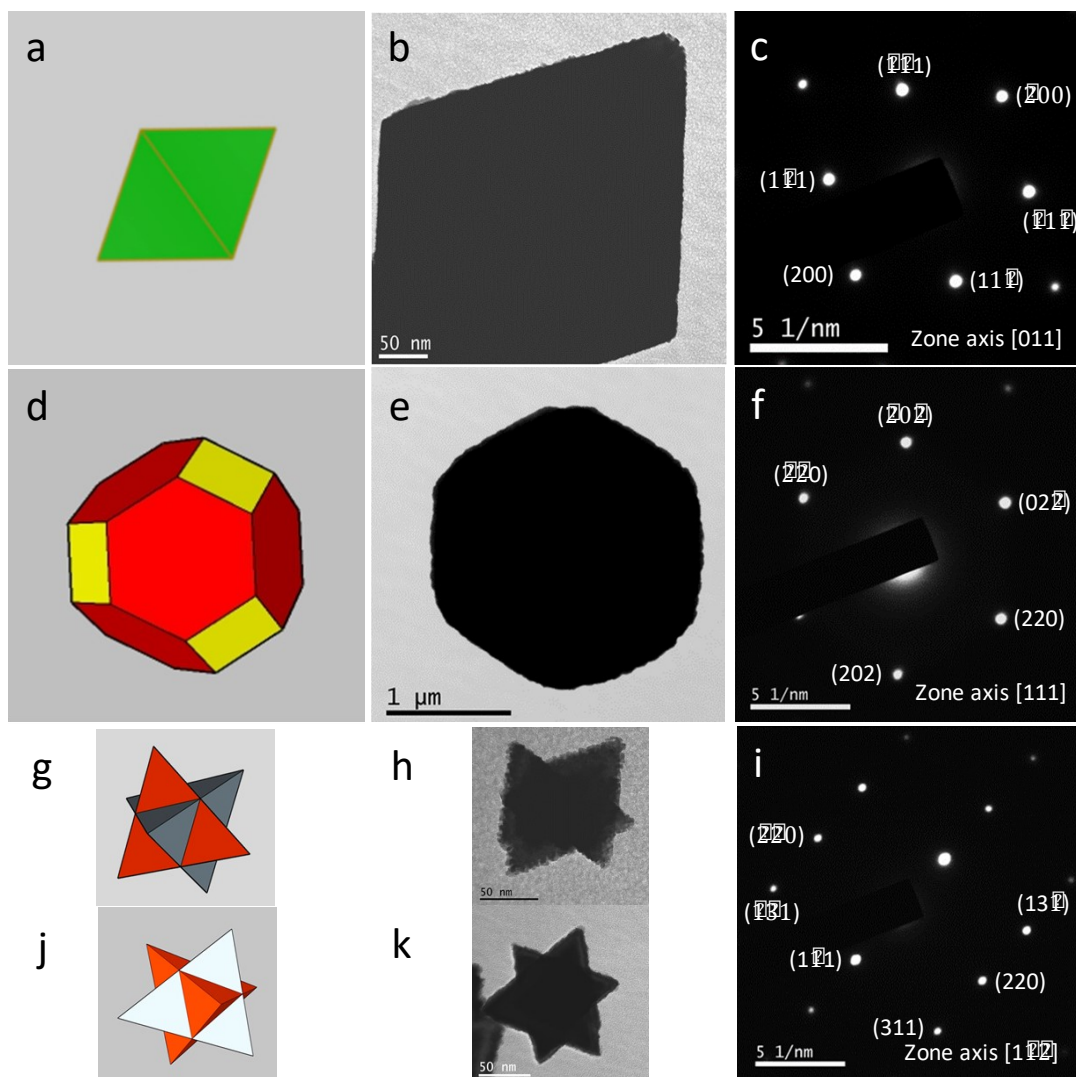

**Fig. S3** TEM images, the corresponding SAED patterns, and models showing the particle orientations of CdO (a–c) octahedron, (d–f) truncated octahedron, and (g–i) stellated octahedron. Extended electron beam irradiation causes the stellated octahedron surfaces to become roughened. (j, k) Model and TEM image of another stellated octahedron.

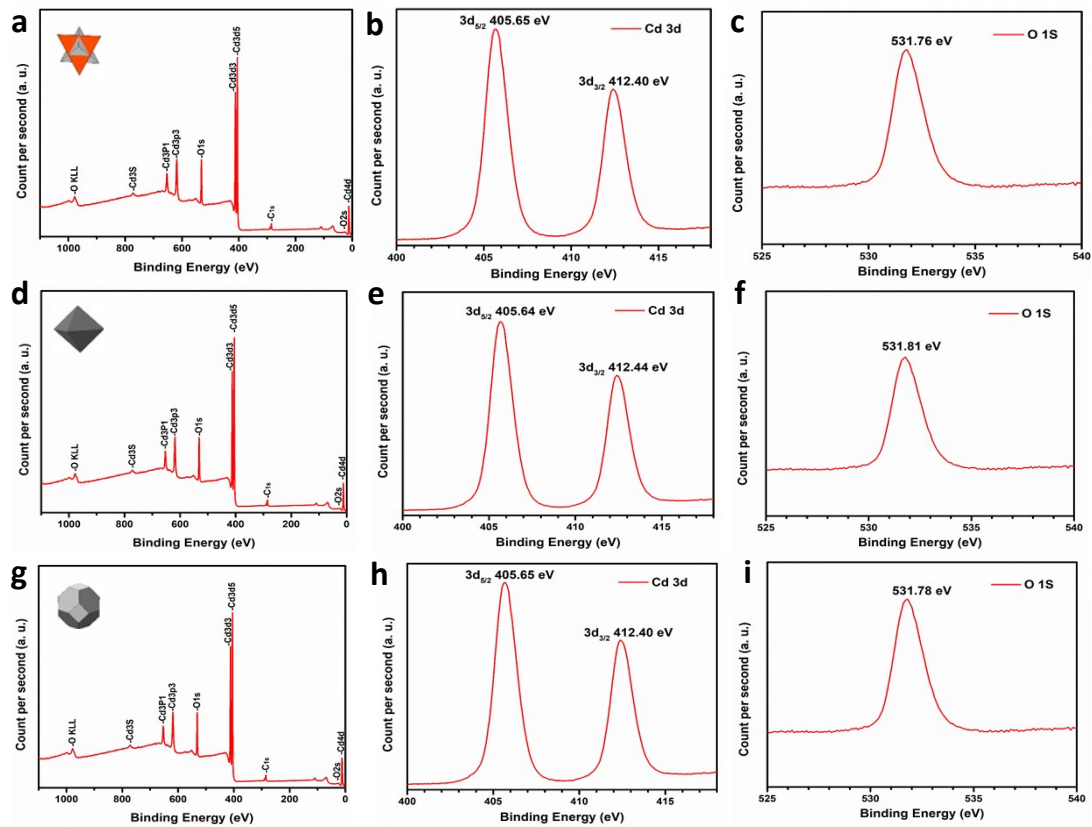

**Fig. S4** (a–c) Full XPS spectrum of the CdO stellated octahedra and regions of Cd 3d and O 1s peaks. (d–f) Full XPS spectrum of CdO octahedra and regions of Cd 3d and O 1s peaks. (g–i) Full XPS spectrum of the CdO truncated octahedra and regions of Cd 3d and O 1s peaks.

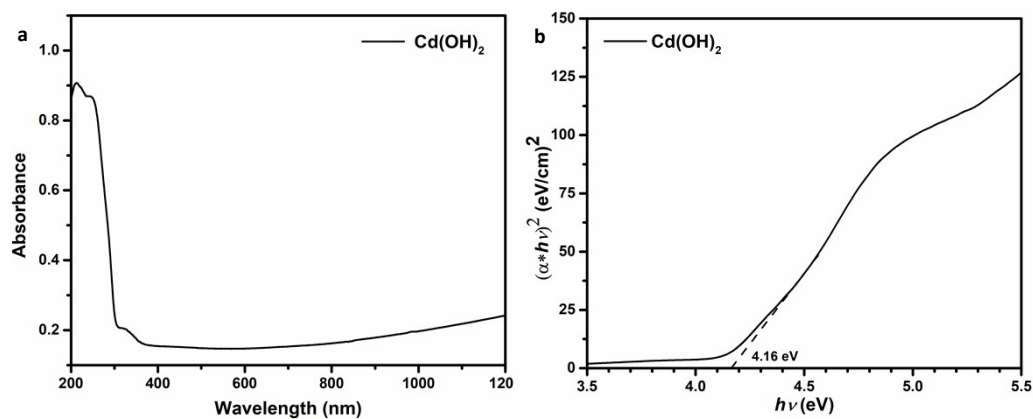

**Fig. S5** (a) Diffuse reflectance spectrum of Cd(OH)<sub>2</sub> hexagonal plates and (b) the corresponding Tauc plot.

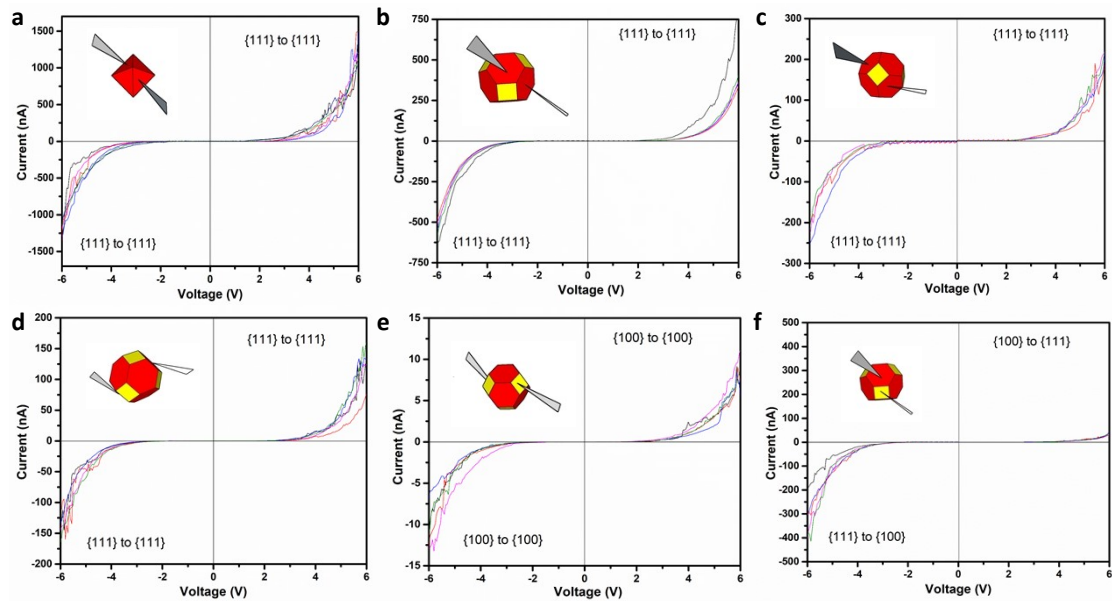

**Fig. S6** Measured  $I$ - $V$  curves with tungsten probes contacting (a) a CdO octahedron, (b) adjacent  $\{111\}$  faces of a CdO truncated octahedron, (c) proximal  $\{111\}$  faces of a truncated octahedron, (d) opposite  $\{111\}$  faces of a truncated octahedron, (e) opposite  $\{100\}$  faces of a truncated octahedron, and (f)  $\{111\}$  and  $\{100\}$  faces of a truncated octahedron.

## Reference

- 1 B. H. Toby, R. B. Von Dreele, GSAS-II: the genesis of a modern open-source all purpose crystallography software package. *J. Appl. Crystallogr.*, 2013, **46**, 544–549.
